# Supplementary material
Source: PubMed Central journal article supplement (PMC397431)
Supplement: pnas_101_15_5589__1.pdf [file pnas_101_15_5589__1.pdf]

## Supporting Text

### Supporting Materials and Methods

The number of hits from *Brassica oleracea* could not be directly converted into transposable element (TE) copy number because the Institute for Genomic Research (TIGR) *B. oleracea* database consists of short reads (on average ~650 bp), and two hits from two different reads could represent different regions of the same element. Thus, the hits from each TBLASTN search can be divided into two types: those covering the entire query (full-length hits) and those that are truncated due to cloning and only contain part of the query (partial hits). Each full-length hit represents one element, whereas statistically each partial hit represents half an element. Let the probability that a particular hit is full length be  $P_f$ , the probability that a hit is partial should be  $1 - P_f$ . The copy number of a certain type of element in the current *B. oleracea* database ( $N_{cp}$ ) can be estimated based on the number of hits ( $N_{hits}$ ) as:

$$N_{cp} = N_{hits} \left[ P_f + \frac{1}{2}(1 - P_f) \right] \quad [1]$$

or

$$N_{cp} = N_{hits} \frac{1}{2}(1 + P_f) \quad [2]$$

$P_f$  can be estimated based on the effective query length ( $L_{eq}$ ) and the length of reads in the database ( $L_{dr}$ ) as:

$$P_f = (L_{dr} - L_{eq}) / (L_{dr} + L_{eq}) \quad [3]$$

Combining Eqs. 1 and 2 and considering the current *B. oleracea* database covers approximately one third of the genome, the total copy ( $N$ ) in the entire genome should be:

$$N = \frac{3}{2} N_{hits} \left[ 1 + \frac{(L_{dr} - L_{eq})}{(L_{dr} + L_{eq})} \right] \text{ [4]}$$

Thus, the copy number of a certain type of elements in the *B. oleracea* genome can be estimated based on the number of hits and query length by using Eq. 4.

Eq. 4 contains two correlated variables, effective query length ( $L_{eq}$ ) and number of hits ( $N_{hits}$ ). A longer query would yield more hits. However, if Eq. 4 is correct, the total copy number should not change (as it is a constant). This was tested on *B. oleracea* long interspersed nuclear elements (LINEs) as an example. Nine queries, ranging from 70 to 150 aa in length, were derived from the most conserved RT region in *Arabidopsis* LINEs and used in TBLASTN searches against the TIGR *B. oleracea* database. As shown in Fig. 6, when query length increased from 70 to 150 aa,  $N_{hits}$  increased from 1,329 to 1,729. However, there was very little variation in  $N_{cp}$  values (on average  $\sim 1,100$ ). Thus, the total copy number of LINEs in *B. oleracea* was estimated to be  $\sim 3,300$ .

A second test of equation E was performed on a simulated database containing a known number of LINEs, constructed as following. One hundred *Arabidopsis* genomic fragments, each 10 kb long and containing a LINE element, were combined, and the resulting 1 Mb sequence was randomly divided into 1,534 segments. Each segment was 600-700 bp long and the average length was 652 bp, thus resembling the TIGR *B. oleracea* database but containing a known number (100) of LINEs (database available upon request). The same set of queries used in test 1 were then used in TBLASTN searches against the simulated database, and the results are shown in Fig. 6b. Although there appeared to be a slight underestimate, the average value of  $N_{cp}$  (97) is very close to the actual copy number of LINEs in the database. Taken together, the results from these two tests indicated that it is feasible to use Eq. 4 to estimate TE copy numbers in *B. oleracea* based on the number of TBLASTN hits from the TIGR database.
